# Supplementary material
Source: ML conference proceedings conference paper supplement (https://proceedings.neurips.cc/paper_files/paper/2016/hash/ca460332316d6da84b08b9bcf39b687b-Abstract.html)
Supplement: Supplementary file 1 [file ca460332316d6da84b08b9bcf39b687b-Supplemental.zip]

Archive with 1 entries (1 files):
- supplementary_material6.pdf
